# Supplementary material for: Individual, employment and psychosocial factors influencing walking to work: Implications for intervention design
Source: PLOS journal article supplement (doi:10.1371/journal.pone.0171374), 2017-02-09
Supplement: S2 (10.1371/journal.pone.0171374.s002) [file journal.pone.0171374.s002]

**Table S2. Univariate associations for perceived barriers, psychosocial factors and likelihood of commuter walking**

|                                             | <b>Commuter<br/>non-walkers<br/>Total n=602<br/>n<sup>a</sup><br/>(% agree)</b> | <b>Commuter<br/>walkers<br/>Total n=587<br/>n<sup>a</sup><br/>(% agree)</b> | <b>Univariate association with<br/>commuter walking</b> |                     |
|---------------------------------------------|---------------------------------------------------------------------------------|-----------------------------------------------------------------------------|---------------------------------------------------------|---------------------|
|                                             |                                                                                 |                                                                             | <b>OR (CI)<sup>b</sup></b>                              | <b>p-<br/>value</b> |
| <b>Perceived barriers<sup>c</sup></b>       |                                                                                 |                                                                             |                                                         |                     |
| I live too far away from work               | 403 (66.9)                                                                      | 210 (35.8)                                                                  | 0.28 (0.22, 0.35)                                       | <b>&lt;0.001</b>    |
| Less convenient than using a car            | 296 (49.2)                                                                      | 84 (14.3)                                                                   | 0.17 (0.13, 0.23)                                       | <b>&lt;0.001</b>    |
| It takes too long                           | 289 (48.0)                                                                      | 149 (25.4)                                                                  | 0.37 (0.29, 0.47)                                       | <b>&lt;0.001</b>    |
| I don't have time                           | 249 (41.4)                                                                      | 126 (21.5)                                                                  | 0.39 (0.30, 0.50)                                       | <b>&lt;0.001</b>    |
| I need a car to do my job                   | 198 (32.9)                                                                      | 66 (11.2)                                                                   | 0.26 (0.19, 0.35)                                       | <b>&lt;0.001</b>    |
| I have too much to carry                    | 132 (21.9)                                                                      | 95 (16.2)                                                                   | 0.69 (0.51, 0.92)                                       | <b>0.012</b>        |
| Need to do other activities on the way      | 122 (20.3)                                                                      | 57 (9.7)                                                                    | 0.42 (0.30, 0.59)                                       | <b>&lt;0.001</b>    |
| Need to drop off/collect children           | 121 (20.1)                                                                      | 63 (10.7)                                                                   | 0.48 (0.34, 0.66)                                       | <b>&lt;0.001</b>    |
| I do lots of other activity/sport           | 91 (15.1)                                                                       | 61 (10.4)                                                                   | 0.65 (0.46, 0.92)                                       | <b>0.015</b>        |
| I've always travelled the same way          | 77 (12.8)                                                                       | 38 (6.5)                                                                    | 0.47 (0.31, 0.71)                                       | <b>&lt;0.001</b>    |
| <b>Psychosocial factors</b>                 |                                                                                 |                                                                             |                                                         |                     |
| Attitude <sup>d</sup>                       | 203 (37.9)                                                                      | 366 (70.0)                                                                  | 3.81 (2.95, 4.92)                                       | <b>&lt;0.001</b>    |
| Perceived behavioural control <sup>d</sup>  | 152 (26.8)                                                                      | 481 (86.5)                                                                  | 17.55 (12.92, 23.84)                                    | <b>&lt;0.001</b>    |
| Intention <sup>d</sup>                      | 95 (16.9)                                                                       | 430 (77.8)                                                                  | 17.19 (12.76, 23.15)                                    | <b>&lt;0.001</b>    |
| Social norm <sup>d</sup>                    | 122 (24.5)                                                                      | 189 (40.8)                                                                  | 2.12 (1.61, 2.79)                                       | <b>&lt;0.001</b>    |
| Social support from colleagues <sup>e</sup> | 44 (7.5)                                                                        | 100 (17.7)                                                                  | 2.63 (1.81, 3.83)                                       | <b>&lt;0.001</b>    |

<sup>a</sup>Numbers do not sum to total due to missing responses

<sup>b</sup>OR (CI)=odds ratio (95% confidence interval)

<sup>c</sup>The reference category is no (item is not considered a barrier)

<sup>d</sup>The reference category is strongly disagree or disagree

<sup>e</sup>The reference category is disagree
